# Supplementary material for: Assessment of Response of Kidney Tumors to Rapamycin and Atorvastatin in Tsc1+/− Mice
Source: PubMed Central journal article supplement — Transl Oncol. 2017 Aug 24;10(5):793–9. doi: 10.1016/j.tranon.2017.07.009 (PMC5570581; doi:10.1016/j.tranon.2017.07.009), 2017-08-24
Supplement: mmc1.pdf [file mmc1.pdf]

**Supplementary Table 1 First MRI assessment of tumour burden in *Tsc1*<sup>+/-</sup> mice before treatment**

(Mann Whitney test )

A. Lesion number (all cystic, papillary and solid lesions)

| Treatment*             | Number of mice | Median | Range | P (compared with Vehicle) | P (compared with Rapamycin) | P (compared with Rapamycin+Atorvastatin) |
|------------------------|----------------|--------|-------|---------------------------|-----------------------------|------------------------------------------|
| Vehicle                | 6              | 14     | 8-24  |                           |                             |                                          |
| Atorvastatin           | 6              | 15.5   | 10-29 | 0.5628                    | 0.8398                      | 0.9134                                   |
| Rapamycin              | 6              | 18     | 10-27 | 0.5130                    |                             |                                          |
| Rapamycin+Atorvastatin | 6              | 17     | 14-22 | 0.4935                    | 0.8463                      |                                          |

B. Lesion volume (all cystic, papillary and solid lesions)

| Treatment*             | Number of mice | Median (mm <sup>3</sup> ) | Range (mm <sup>3</sup> ) | P (compared with Vehicle) | P (compared with Rapamycin) | P (compared with Rapamycin+Atorvastatin) |
|------------------------|----------------|---------------------------|--------------------------|---------------------------|-----------------------------|------------------------------------------|
| Vehicle                | 6              | 20.205                    | 10.18-93.95              |                           |                             |                                          |
| Atorvastatin           | 6              | 15.435                    | 5.04-38.16               | 0.5887                    | 0.8182                      | 0.8182                                   |
| Rapamycin              | 6              | 16.52                     | 10.59-47.65              | 0.6991                    |                             |                                          |
| Rapamycin+Atorvastatin | 6              | 21.11                     | 7.61-29.78               | 0.9372                    | 0.6991                      |                                          |

\* The 1st MRI scan was performed before treatment at the age of 12 months.
