# Supplementary material for: Assessment of Response of Kidney Tumors to Rapamycin and Atorvastatin in Tsc1+/− Mice
Source: PubMed Central journal article supplement — Transl Oncol. 2017 Aug 24;10(5):793–9. doi: 10.1016/j.tranon.2017.07.009 (PMC5570581; doi:10.1016/j.tranon.2017.07.009), 2017-08-24
Supplement: mmc2.pdf [file mmc2.pdf]

**Supplementary Table 2 Second MRI assessment of tumour burden in *Tsc1*<sup>+/-</sup> mice after treatment**

(Mann Whitney test )

A. Lesion number (all cystic, papillary and solid lesions)

| Treatment*             | Number of mice | Median | Range | P (compared with Vehicle) | P (compared with Rapamycin) | P (compared with Rapamycin+Atorvastatin) |
|------------------------|----------------|--------|-------|---------------------------|-----------------------------|------------------------------------------|
| Vehicle                | 6              | 17     | 14-36 |                           |                             |                                          |
| Atorvastatin           | 6              | 21     | 19-40 | 0.1623                    | 0.0022                      | 0.0022                                   |
| Rapamycin              | 6              | 14.5   | 4-17  | 0.1797                    |                             |                                          |
| Rapamycin+Atorvastatin | 6              | 12.5   | 8-17  | 0.0173                    | 0.7792                      |                                          |

B. Lesion volume (all cystic, papillary and solid lesions)

| Treatment*             | Number of mice | Median (mm <sup>3</sup> ) | Range (mm <sup>3</sup> ) | P (compared with Vehicle) | P (compared with Rapamycin) | P (compared with Rapamycin+Atorvastatin) |
|------------------------|----------------|---------------------------|--------------------------|---------------------------|-----------------------------|------------------------------------------|
| Vehicle                | 6              | 46.08                     | 20.66-158.82             |                           |                             |                                          |
| Atorvastatin           | 6              | 45.975                    | 21.98-119.98             | 0.9372                    | 0.0087                      | 0.0022                                   |
| Rapamycin              | 6              | 9.695                     | 2.36-36.99               | 0.0087                    |                             |                                          |
| Rapamycin+Atorvastatin | 6              | 6.62                      | 2.32-20.5                | 0.0022                    | 0.4848                      |                                          |

\* The 2nd MRI scan was performed after two months' treatment at the age of 14 months.
