# Supplementary material for: Assessment of Response of Kidney Tumors to Rapamycin and Atorvastatin in Tsc1+/− Mice
Source: PubMed Central journal article supplement — Transl Oncol. 2017 Aug 24;10(5):793–9. doi: 10.1016/j.tranon.2017.07.009 (PMC5570581; doi:10.1016/j.tranon.2017.07.009), 2017-08-24
Supplement: mmc3.pdf [file mmc3.pdf]

**Supplementary Table 3 Fold change in lesion lumber and volume obtained by MRI analysis in *Tsc1*<sup>+/-</sup> mice after treatment**  
(Mann Whitney test )

A. Fold change in lesion number (2<sup>nd</sup>/1<sup>st</sup> scan)

| Treatment*             | Number of mice | Median | Range     | P (compared with Vehicle) | P (compared with Rapamycin) | P (compared with Rapamycin+Atorvastatin) |
|------------------------|----------------|--------|-----------|---------------------------|-----------------------------|------------------------------------------|
| Vehicle                | 6              | 1.32   | 1.20-1.88 |                           |                             |                                          |
| Atorvastatin           | 6              | 1.38   | 1.33-1.90 | 0.5887                    | 0.0022                      | 0.0022                                   |
| Rapamycin              | 6              | 0.74   | 0.36-0.90 | 0.0022                    |                             |                                          |
| Rapamycin+Atorvastatin | 6              | 0.75   | 0.50-0.89 | 0.0022                    | 0.9372                      |                                          |

B. Fold change in lesion volume (2<sup>nd</sup>/1<sup>st</sup> scan)

| Treatment*             | Number of mice | Median | Range     | P (compared with Vehicle) | P (compared with Rapamycin) | P (compared with Rapamycin+Atorvastatin) |
|------------------------|----------------|--------|-----------|---------------------------|-----------------------------|------------------------------------------|
| Vehicle                | 6              | 1.95   | 1.54-2.52 |                           |                             |                                          |
| Atorvastatin           | 6              | 2.76   | 2.08-4.76 | 0.0649                    | 0.0022                      | 0.0022                                   |
| Rapamycin              | 6              | 0.72   | 0.17-0.95 | 0.0022                    |                             |                                          |
| Rapamycin+Atorvastatin | 6              | 0.36   | 0.14-0.90 | 0.0022                    | 0.3939                      |                                          |

\* Treatment and MRI scans were performed as in Supplemental Tables 1 and 2.
